# Supplementary material for: Semibath Polymerization Approach for One-Pot Synthesis of Temperature- and Glucose-Responsive Core-Shell Nanogel Particles
Source: Hindawi journal article supplement (doi:10.1155/2018/2180518), 2018-01-01
Supplement: f1 [file 2180518.f1.pdf]

# Supplementary Information for

## **Semi-bath Polymerization Approach for One Pot Synthesis of Temperature and Glucose Responsive Core-Shell Nanogel Particles**

Aslam Khan<sup>1\*</sup>, Ahmed Mohamed El-Toni<sup>1,2</sup>, Javed Alam<sup>1</sup>, Ali Aldalbahi<sup>1,3</sup>, Mukhtar Ahmed<sup>4</sup>, Joselito Puzon Labis<sup>1</sup>, Tansir Ahamad<sup>3</sup>, Mahmoud Hezam<sup>1</sup>

<sup>1</sup>King Abdullah Institute for Nanotechnology, King Saud University, Riyadh 11451, Saudi Arabia

<sup>2</sup>Central Metallurgical Research and Development Institute, CMRDI, Helwan 11421, Cairo, Egypt

<sup>3</sup>Department of Chemistry, College of Science, King Saud University, Riyadh 11451 Saudi Arabia

<sup>4</sup>Department of Zoology, College of Science, King Saud University, Riyadh 11451 Saudi Arabia

Email: aslamkhan@ksu.edu.sa

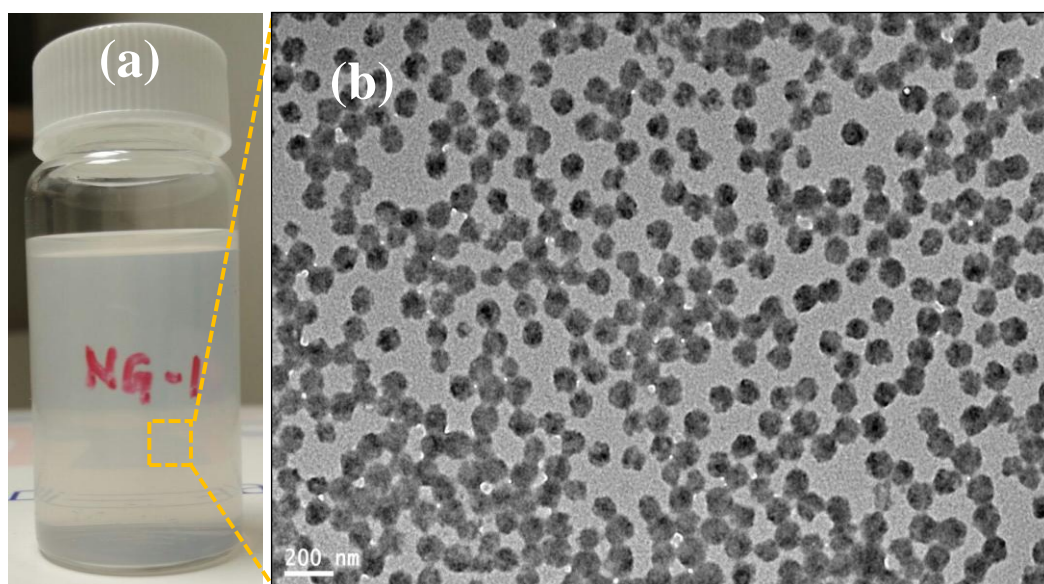

**Figure S1.** (a) Digital photograph of the P(NIPAm-APBA-AAc) nanogels [NG-1 sample] after 4 months of storage at room temperature and (b) its corresponding TEM image.
